# Supplementary material
Source: MDPI journal article supplement (https://www.mdpi.com/2227-9040/8/2/27)
Supplement: s1 [file s1]

## Supplementary Part

## Supplementary Figure S1

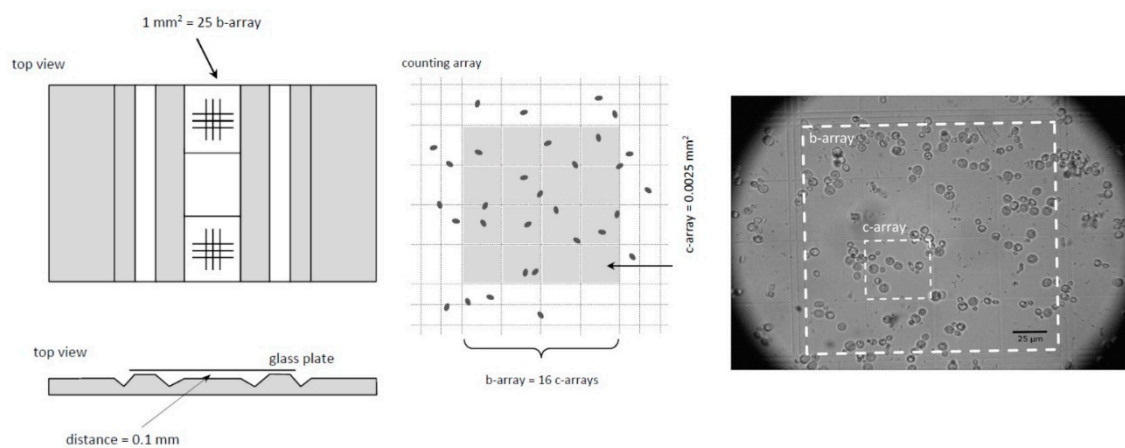**Figure S1.** Cell counting procedure for Thoma chamber cell counting

## Supplementary Figure S2:

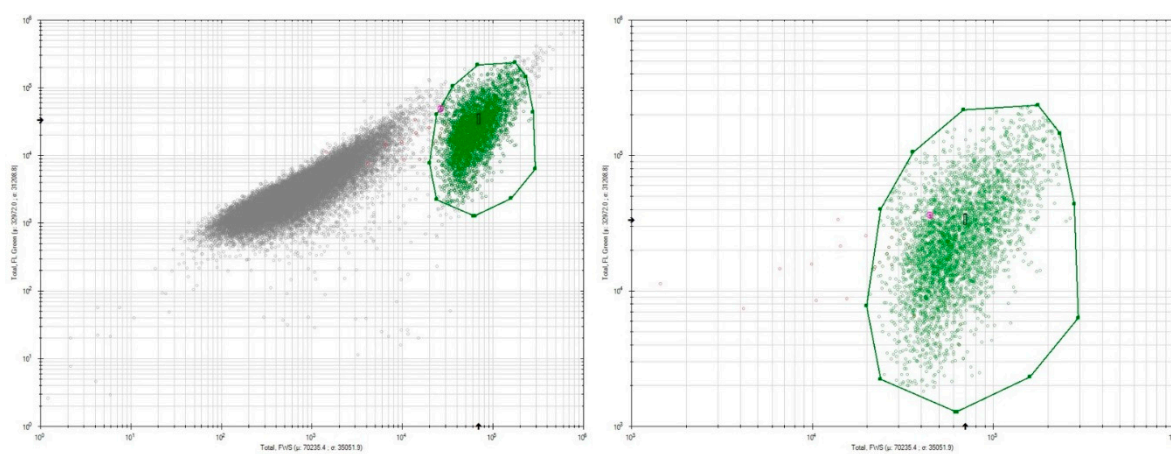**Figure S2.** l.h.s. all events measured in the flow cytometer; r.h.s. zoom in to living cell, almost no dead cells can be seen during the cultivation.
